# Supplementary material for: Strain engineering of Li+ion migration in olivine phosphate cathode materials LiMPO4(M = Mn, Fe, Co) and (LiFePO4)n(LiMnPO4)msuperlattices
Source: Royal Society of Chemistry journal article supplement (doi:10.1039/d2cp05241e), 2023-01-01
Supplement: d2cp05241e1.pdf [file d2cp05241e1.pdf]

## Supporting Information (SI)

### Strain engineering of Li<sup>+</sup> ions migration in olivine phosphates cathode materials LiMPO<sub>4</sub> (M = Mn, Fe, Co) and (LiFePO<sub>4</sub>)<sub>n</sub>(LiMnPO<sub>4</sub>)<sub>m</sub> superlattices

Wang Zhang,<sup>a</sup> Fu-Ye Du,<sup>a</sup> Yang Dai<sup>\*b</sup> and Jin-Cheng Zheng<sup>\*ac</sup>

<sup>a</sup> Department of Physics, Xiamen University, Xiamen 361005, China.

<sup>b</sup> Department of Chemical Engineering, School of Environmental and Chemical Engineering, and Institute for Sustainable Energy, Shanghai University, Shangda Road 99, Shanghai 200444, China.

<sup>c</sup> Department of Physics, and Department of New Energy Science and Engineering, Xiamen University Malaysia, Sepang 43900, Malaysia

\*Corresponding authors: E-mail address: [jczheng@xmu.edu.cn](mailto:jczheng@xmu.edu.cn) (Jin-Cheng Zheng), [dy1982@shu.edu.cn](mailto:dy1982@shu.edu.cn) (Yang Dai).

Table S1 The fitting parameters were obtained by fitting the  $E_b$  strain data of LiMPO<sub>4</sub> (M = Mn, Fe, Co) with quadratic function:  $E_b = \alpha x^2 + \beta x + E_0$ .

|        | strain    | LiMnPO <sub>4</sub> |          |       | LiFePO <sub>4</sub> |          |       | LiCoPO <sub>4</sub> |          |       |
|--------|-----------|---------------------|----------|-------|---------------------|----------|-------|---------------------|----------|-------|
|        |           | $\alpha$            | $\beta$  | $E_0$ | $\alpha$            | $\beta$  | $E_0$ | $\alpha$            | $\beta$  | $E_0$ |
| Path A | <i>ac</i> | 0.00572             | -0.11079 | 0.61  | 0.00434             | -0.10015 | 0.54  | 0.00525             | -0.10149 | 0.48  |
|        | <i>ab</i> | -0.00299            | 0.05033  | 0.61  | -0.00283            | 0.04439  | 0.54  | -0.00153            | 0.04739  | 0.48  |
|        | <i>bc</i> | -0.00368            | 0.03078  | 0.61  | -0.00427            | 0.02849  | 0.54  | -0.00363            | 0.0313   | 0.48  |
| Path B | <i>ac</i> | -0.00483            | -0.04853 | 2.84  | -0.00823            | -0.00614 | 2.91  | -0.00983            | -0.03035 | 3.29  |
|        | <i>ab</i> | -0.00486            | -0.21652 | 2.84  | -0.01004            | -0.27    | 2.91  | -0.00825            | -0.2491  | 3.29  |
|        | <i>bc</i> | -0.01386            | -0.07672 | 2.84  | -0.02257            | -0.11289 | 2.91  | -0.02067            | -0.1134  | 3.29  |
| Path A | <i>a</i>  | 0                   | -0.03316 | 0.61  | 0                   | -0.03421 | 0.54  | 0                   | -0.03149 | 0.48  |
|        | <i>b</i>  | 0                   | 0.06604  | 0.61  | 0                   | 0.05909  | 0.54  | 0                   | 0.06143  | 0.48  |
|        | <i>c</i>  | 0                   | -0.04168 | 0.61  | 0                   | -0.0381  | 0.54  | 0                   | -0.03599 | 0.48  |
| Path B | <i>a</i>  | -0.00146            | -0.05139 | 2.84  | -0.00435            | -0.02535 | 2.91  | -0.00305            | -0.03669 | 3.29  |
|        | <i>b</i>  | -0.00429            | -0.08246 | 2.84  | -0.00796            | -0.11123 | 2.91  | -0.00878            | -0.11204 | 3.29  |
|        | <i>c</i>  | -0.00346            | 0.02009  | 2.84  | -0.00402            | 0.02518  | 2.91  | -0.00396            | 0.01934  | 3.29  |

Table S2 Comparison of the calculated superlattice volume with the ideal superlattice volume.

|            | Calculated volume (Å <sup>3</sup> ) | Ideal volume (Å <sup>3</sup> ) |
|------------|-------------------------------------|--------------------------------|
| LFP        | 291.4417                            | 291.4417                       |
| SL3+1(100) | 293.7849                            | 293.7390                       |
| SL3+1(010) | 293.7897                            |                                |
| SL3+1(001) | 293.8648                            |                                |
| SL1+1(100) | 296.0966                            | 296.0364                       |
| SL1+1(010) | 296.1290                            |                                |
| SL1+1(001) | 296.1021                            |                                |
| SL1+3(100) | 298.3603                            | 298.3337                       |
| SL1+3(010) | 298.3923                            |                                |
| SL1+3(001) | 298.4556                            |                                |
| LMP        | 300.6310                            | 300.6310                       |

Table S3 The fitting parameters were obtained by fitting the  $E_b$  strain data of SL3+1(100), SL3+1(010) and SL3+1(001) with quadratic function:  $E_b = \alpha x^2 + \beta x + E_0$ .

|                  | strain | SL3+1(100) |          |       | SL3+1(010) |          |       | SL3+1(001) |          |       |
|------------------|--------|------------|----------|-------|------------|----------|-------|------------|----------|-------|
|                  |        | $\alpha$   | $\beta$  | $E_0$ | $\alpha$   | $\beta$  | $E_0$ | $\alpha$   | $\beta$  | $E_0$ |
| Path A<br>site 1 | ac     | 0.00458    | -0.10127 | 0.56  | 0.00556    | -0.11179 | 0.62  | 0.00424    | -0.09936 | 0.56  |
|                  | ab     | -0.00327   | 0.0419   | 0.56  | -0.00316   | 0.04621  | 0.62  | -0.00298   | 0.04658  | 0.56  |
|                  | bc     | -0.00391   | 0.02993  | 0.56  | -0.00415   | -0.02612 | 0.62  | -0.00452   | 0.02733  | 0.56  |
|                  | a      | 0          | -0.03449 | 0.56  | 0          | -0.03571 | 0.62  | 0          | -0.03193 | 0.56  |
|                  | b      | 0          | 0.05929  | 0.56  | 0          | 0.0625   | 0.62  | 0          | 0.05922  | 0.56  |
|                  | c      | 0          | -0.03719 | 0.56  | 0          | -0.0429  | 0.62  | 0          | -0.03886 | 0.56  |
| Path A<br>site 2 | ac     | 0.00435    | -0.09906 | 0.55  | 0.00405    | -0.10014 | 0.49  | 0.00483    | -0.10537 | 0.58  |
|                  | ab     | -0.00272   | 0.04435  | 0.55  | -0.00304   | 0.05038  | 0.49  | -0.00259   | 0.04515  | 0.58  |
|                  | bc     | -0.00413   | 0.02576  | 0.55  | -0.00428   | 0.03279  | 0.49  | -0.00421   | 0.02414  | 0.58  |
|                  | a      | 0          | -0.03154 | 0.55  | 0          | -0.03352 | 0.49  | 0          | -0.03307 | 0.58  |
|                  | b      | 0          | 0.05786  | 0.55  | 0          | 0.06254  | 0.49  | 0          | 0.05968  | 0.58  |
|                  | c      | 0          | -0.03898 | 0.55  | 0          | -0.03776 | 0.49  | 0          | -0.04205 | 0.58  |
| Path B<br>site 1 | ac     | -0.00686   | -0.01493 | 2.86  | -0.00719   | -0.01384 | 2.86  | -0.00737   | -0.02051 | 2.86  |
|                  | ab     | -0.00745   | -0.25013 | 2.86  | -0.00656   | -0.25292 | 2.86  | -0.01039   | -0.267   | 2.86  |
|                  | bc     | -0.02067   | -0.10541 | 2.86  | -0.01664   | -0.09411 | 2.86  | -0.02148   | -0.11862 | 2.86  |
|                  | a      | -0.00331   | -0.03144 | 2.86  | -0.0026    | -0.03414 | 2.86  | -0.00409   | -0.02945 | 2.86  |
|                  | b      | -0.00696   | -0.10326 | 2.86  | -0.00493   | -0.10073 | 2.86  | -0.00746   | -0.11139 | 2.86  |
|                  | c      | -0.00414   | 0.0243   | 2.86  | -0.00352   | 0.02798  | 2.86  | -0.00402   | 0.01887  | 2.86  |
| Path B<br>site 2 | ac     | -0.00747   | -0.01219 | 2.87  | -0.00865   | -0.02076 | 2.87  | -0.00838   | -0.00343 | 2.89  |
|                  | ab     | -0.01055   | -0.27319 | 2.87  | -0.00919   | -0.26603 | 2.87  | -0.00901   | -0.27697 | 2.89  |
|                  | bc     | -0.02269   | -0.12422 | 2.87  | -0.02141   | -0.10745 | 2.87  | -0.02123   | -0.11605 | 2.89  |
|                  | a      | -0.00438   | -0.02743 | 2.87  | -0.00364   | -0.03414 | 2.87  | -0.00346   | -0.02758 | 2.89  |
|                  | b      | -0.00771   | -0.11755 | 2.87  | -0.00763   | -0.10664 | 2.87  | -0.00701   | -0.11878 | 2.89  |
|                  | c      | -0.00394   | 0.02216  | 2.87  | -0.00315   | 0.02471  | 2.87  | -0.00402   | 0.02916  | 2.89  |

Table S4 The fitting parameters were obtained by fitting the  $E_b$  strain data of SL1+1(100), SL1+1(010) and SL1+1(001) with quadratic function:  $E_b = \alpha x^2 + \beta x + E_0$ .

|        | strain | SL1+1(100) |          |       | SL1+1(010) |          |       | SL1+1(001) |          |       |
|--------|--------|------------|----------|-------|------------|----------|-------|------------|----------|-------|
|        |        | $\alpha$   | $\beta$  | $E_0$ | $\alpha$   | $B$      | $E_0$ | $\alpha$   | $\beta$  | $E_0$ |
| Path A | ac     | 0.00415    | -0.09938 | 0.57  | 0.00548    | -0.10997 | 0.56  | 0.00442    | -0.10683 | 0.60  |
|        | ab     | -0.0034    | 0.04183  | 0.57  | -0.00257   | 0.05332  | 0.56  | -0.00361   | 0.04906  | 0.60  |
|        | bc     | -0.00395   | 0.02736  | 0.57  | -0.00346   | 0.03047  | 0.56  | -0.00487   | 0.02374  | 0.60  |
|        | a      | 0          | -0.03245 | 0.57  | 0          | -0.034   | 0.56  | 0          | -0.03129 | 0.60  |
|        | b      | 0          | 0.05824  | 0.57  | 0          | 0.06608  | 0.56  | 0          | 0.0609   | 0.60  |
|        | c      | 0          | -0.03771 | 0.57  | 0          | -0.04272 | 0.56  | 0          | -0.04359 | 0.60  |
| Path B | ac     | -0.00687   | -0.0217  | 2.83  | -0.00824   | -0.02413 | 2.83  | -0.00864   | -0.01996 | 2.86  |
|        | ab     | -0.00768   | -0.25174 | 2.83  | -0.00745   | -0.25129 | 2.83  | -0.00989   | -0.27287 | 2.86  |
|        | bc     | -0.02133   | -0.11576 | 2.83  | -0.01769   | -0.09426 | 2.83  | -0.02034   | -0.11764 | 2.86  |
|        | a      | -0.00357   | -0.03281 | 2.83  | -0.00332   | -0.04093 | 2.83  | -0.00409   | -0.03358 | 2.86  |
|        | b      | -0.00693   | -0.10841 | 2.83  | -0.00624   | -0.10079 | 2.83  | -0.00716   | -0.11791 | 2.86  |

|  |          |          |         |      |         |         |      |          |         |      |
|--|----------|----------|---------|------|---------|---------|------|----------|---------|------|
|  | <i>c</i> | -0.00447 | 0.02042 | 2.83 | -0.0044 | 0.02635 | 2.83 | -0.00461 | 0.02213 | 2.86 |
|--|----------|----------|---------|------|---------|---------|------|----------|---------|------|

Table S5 The fitting parameters were obtained by fitting the  $E_b$  strain data of SL1+3(100), SL1+3(010) and SL1+3(001) with quadratic function:  $E_b = \alpha x^2 + \beta x + E_0$ .

|                  | strain    | SL3+1(100) |          |       | SL3+1(010) |          |       | SL3+1(001) |          |       |
|------------------|-----------|------------|----------|-------|------------|----------|-------|------------|----------|-------|
|                  |           | $\alpha$   | $\beta$  | $E_0$ | $\alpha$   | $\beta$  | $E_0$ | $\alpha$   | $\beta$  | $E_0$ |
| Path A<br>site 1 | <i>ac</i> | 0.00553    | -0.11076 | 0.60  | 0.00483    | -0.10115 | 0.54  | 0.00566    | -0.11057 | 0.60  |
|                  | <i>ab</i> | -0.00249   | 0.05437  | 0.60  | -0.00267   | 0.05045  | 0.54  | -0.00254   | 0.04921  | 0.60  |
|                  | <i>bc</i> | -0.00394   | 0.02938  | 0.60  | -0.00401   | 0.03556  | 0.54  | -0.00385   | 0.03079  | 0.60  |
|                  | <i>a</i>  | 0          | -0.03243 | 0.60  | 0          | -0.03267 | 0.54  | 0          | -0.03445 | 0.60  |
|                  | <i>b</i>  | 0          | 0.06611  | 0.60  | 0          | 0.0644   | 0.54  | 0          | 0.06532  | 0.60  |
|                  | <i>c</i>  | 0          | -0.04327 | 0.60  | 0          | -0.03661 | 0.54  | 0          | -0.04058 | 0.60  |
| Path A<br>site 2 | <i>ac</i> | 0.00618    | -0.11238 | 0.60  | 0.00569    | -0.11323 | 0.66  | 0.00559    | -0.10345 | 0.57  |
|                  | <i>ab</i> | -0.00294   | 0.0507   | 0.60  | -0.00348   | 0.04343  | 0.66  | -0.00207   | 0.04966  | 0.57  |
|                  | <i>bc</i> | -0.0037    | 0.03248  | 0.60  | -0.00435   | 0.02613  | 0.66  | -0.00338   | 0.03332  | 0.57  |
|                  | <i>a</i>  | 0          | -0.03484 | 0.60  | 0          | -0.03474 | 0.66  | 0          | -0.03265 | 0.57  |
|                  | <i>b</i>  | 0          | 0.06636  | 0.60  | 0          | 0.06232  | 0.66  | 0          | -0.06375 | 0.57  |
|                  | <i>c</i>  | 0          | -0.04149 | 0.60  | 0          | -0.04217 | 0.66  | 0          | -0.03679 | 0.57  |
| Path B<br>site 1 | <i>ac</i> | -0.00624   | -0.02807 | 2.80  | -0.00807   | -0.03479 | 2.81  | -0.00509   | -0.03541 | 2.85  |
|                  | <i>ab</i> | -0.00774   | -0.25305 | 2.80  | -0.00709   | -0.24803 | 2.81  | -0.00444   | -0.22148 | 2.85  |
|                  | <i>bc</i> | -0.02132   | -0.12435 | 2.80  | -0.01721   | -0.09035 | 2.81  | -0.01427   | -0.07361 | 2.85  |
|                  | <i>a</i>  | -0.00378   | -0.03466 | 2.80  | -0.00286   | -0.04819 | 2.81  | -0.00096   | -0.04749 | 2.85  |
|                  | <i>b</i>  | -0.00652   | -0.11276 | 2.80  | -0.00612   | -0.09759 | 2.81  | -0.00416   | -0.08305 | 2.85  |
|                  | <i>c</i>  | -0.00412   | 0.01744  | 2.80  | -0.00366   | 0.02615  | 2.81  | -0.00339   | 0.02521  | 2.85  |
| Path B<br>site 2 | <i>ac</i> | -0.00537   | -0.04209 | 2.86  | -0.00481   | -0.0433  | 2.86  | -0.00438   | -0.05204 | 2.83  |
|                  | <i>ab</i> | -0.00504   | -0.21508 | 2.86  | -0.00523   | -0.21811 | 2.86  | -0.00587   | -0.21311 | 2.83  |
|                  | <i>bc</i> | -0.0144    | -0.07145 | 2.86  | -0.01416   | -0.07656 | 2.86  | -0.01459   | -0.07581 | 2.83  |
|                  | <i>a</i>  | -0.00184   | -0.04922 | 2.86  | -0.00136   | -0.04778 | 2.86  | -0.00164   | -0.04932 | 2.83  |
|                  | <i>b</i>  | -0.00492   | -0.08015 | 2.86  | -0.00427   | -0.08206 | 2.86  | -0.00474   | -0.07608 | 2.83  |
|                  | <i>c</i>  | -0.00416   | 0.02213  | 2.86  | -0.00367   | 0.01938  | 2.86  | -0.00331   | 0.01617  | 2.83  |
